# Supplementary material for: Comparison of tertiary structures of proteins in protein-protein complexes with unbound forms suggests prevalence of allostery in signalling proteins
Source: PubMed Central journal article supplement (PMC3427047; doi:10.1186/1472-6807-12-6), 2012-05-03
Supplement: 1472-6807-12-6-S3.pdf [file 1472-6807-12-6-S3.pdf]

**Figure S1: Distribution of parameters capturing structural change for Control and Test datasets**

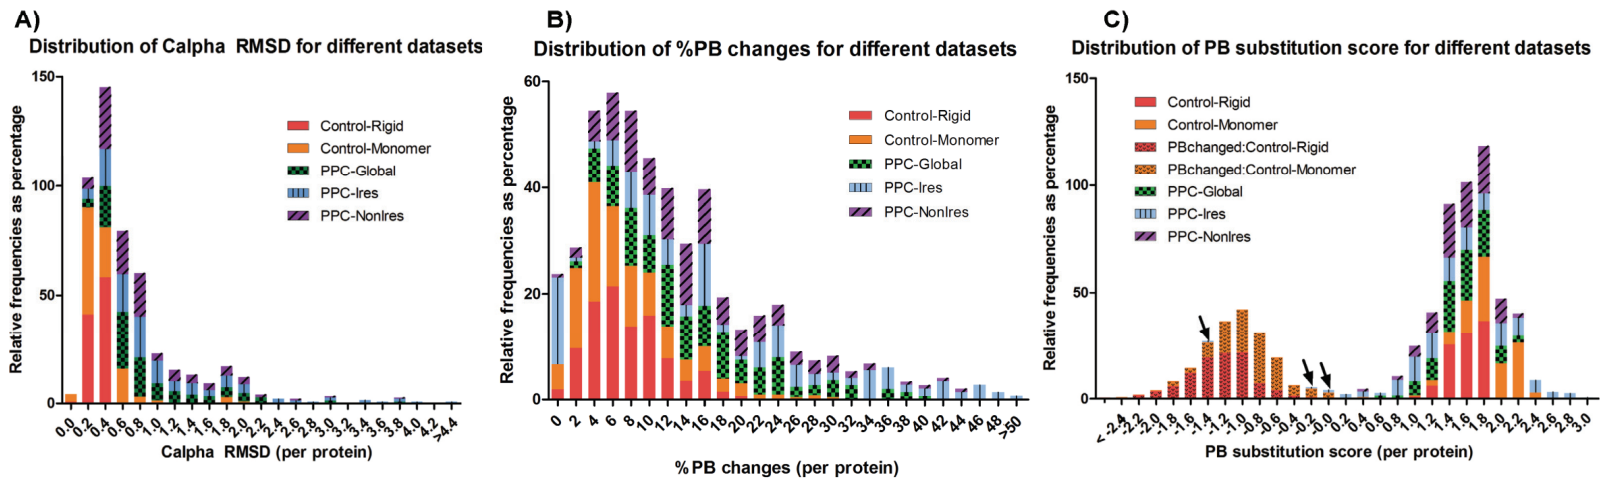

Distribution of values for the three parameters a).  $C\alpha$  RMSD b). %PB changes and c). PB substitution score, which quantify structural change for the following datasets: Changes in all residues (global) for Rigid, Monomeric and PPC datasets; Changes in interacting residues (Ires) for PPC dataset; Changes in Non-interacting residues (NonIres) for PPC dataset. The values plotted are calculated on a per-protein basis. In c), the arrows indicate proteins having negative PB substitution scores for PPI-Ires. The total number of pairwise comparisons used for different datasets are: Control-Rigid (n=1328), Control-Monomer (n=2286), PPC (n=154).
