# Supplementary material for: Comparison of tertiary structures of proteins in protein-protein complexes with unbound forms suggests prevalence of allostery in signalling proteins
Source: PubMed Central journal article supplement (PMC3427047; doi:10.1186/1472-6807-12-6), 2012-05-03
Supplement: 1472-6807-12-6-S5.pdf [file 1472-6807-12-6-S5.pdf]

**Figure S3: Distribution of all-atom RMSD**

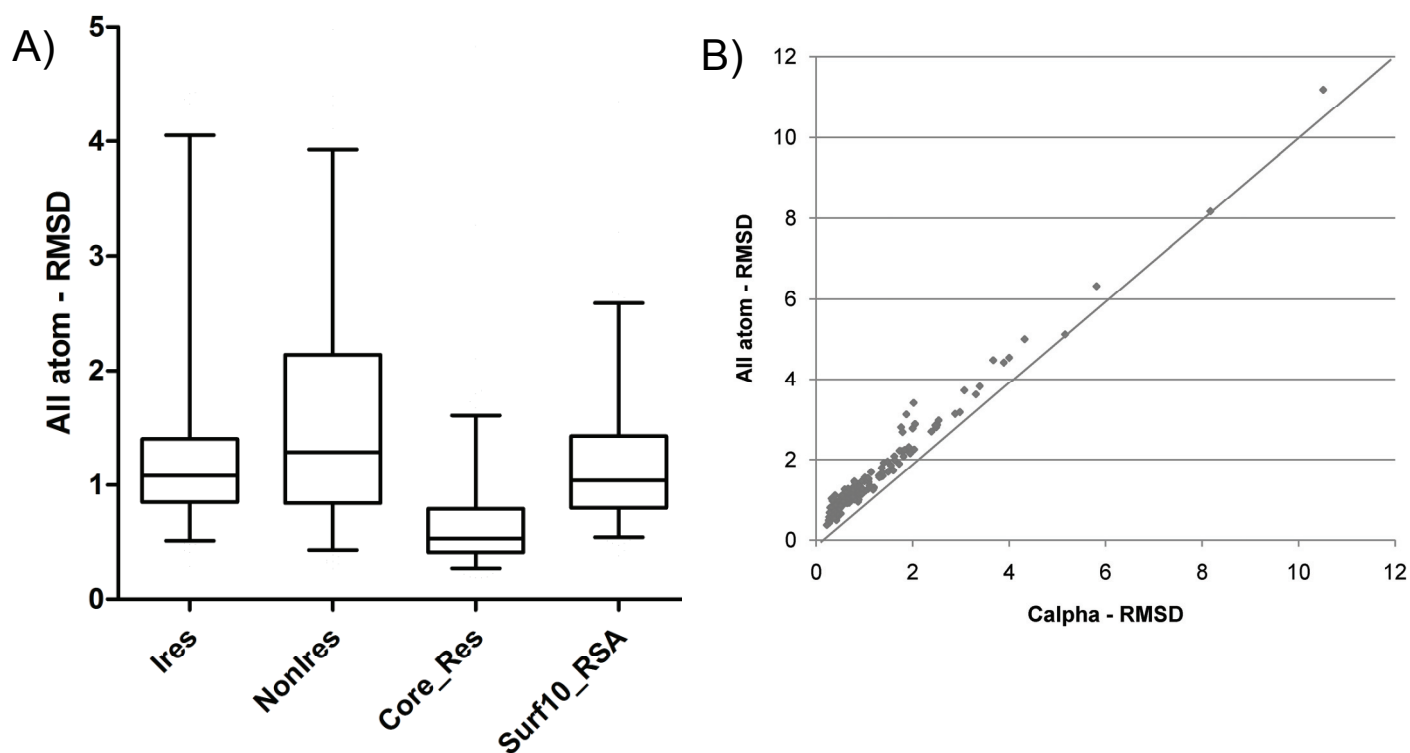

This figure shows a) The distribution of All atom – RMSD values for different residue types in the PPC dataset and b) The scatter plot depicting the correspondence between Calpha - RMSD vs. All atom – RMSD.
