# Supplementary material for: Comparison of tertiary structures of proteins in protein-protein complexes with unbound forms suggests prevalence of allostery in signalling proteins
Source: PubMed Central journal article supplement (PMC3427047; doi:10.1186/1472-6807-12-6), 2012-05-03
Supplement: 1472-6807-12-6-S9.pdf [file 1472-6807-12-6-S9.pdf]

**Figure S7: Distribution of parameters for interface vs. non-interacting surface regions per protein.**

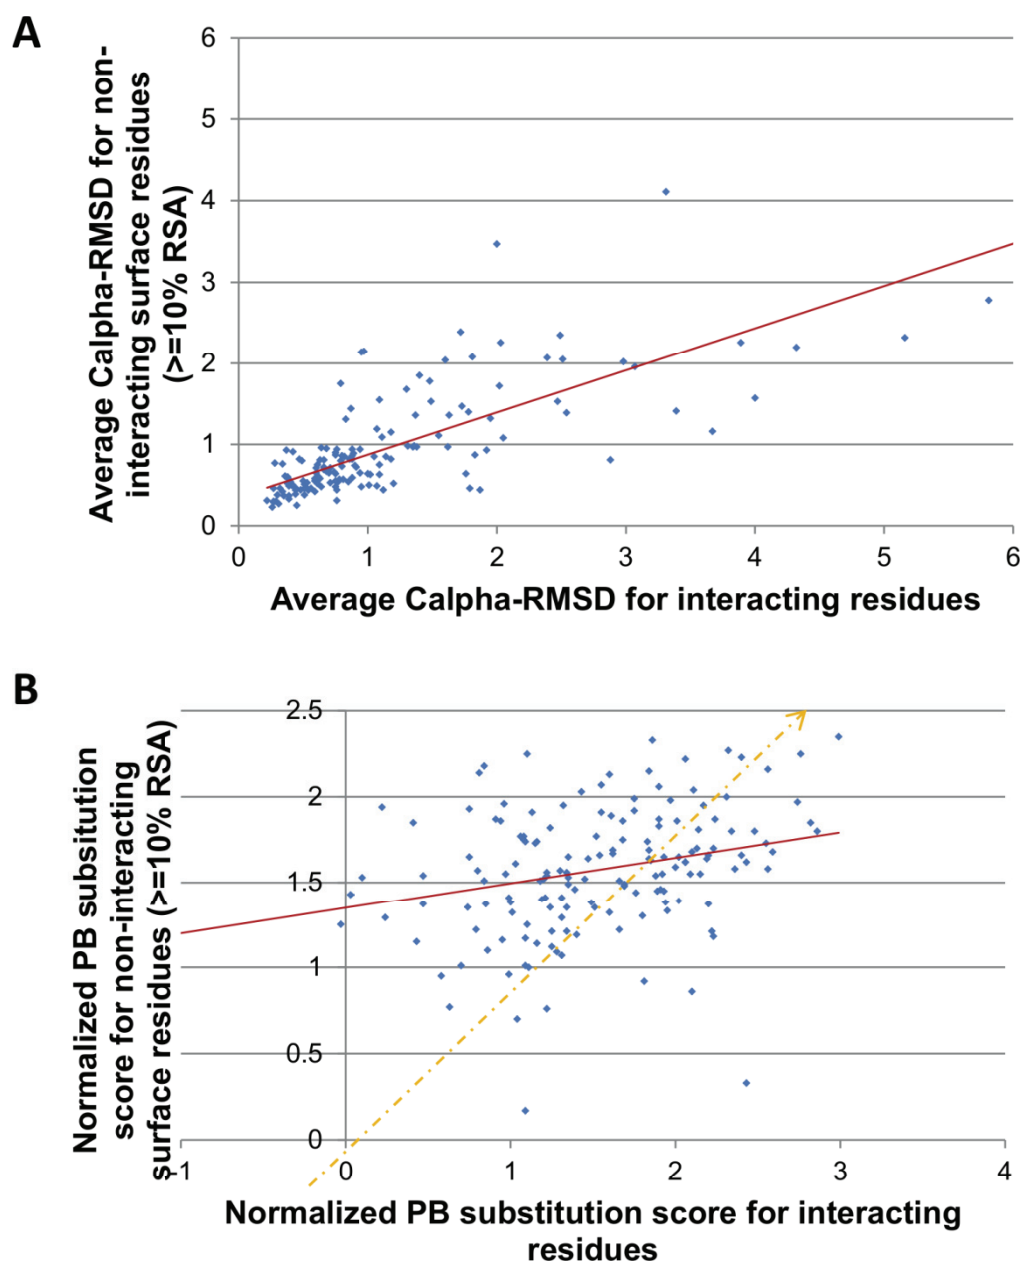

Scatter plot of a). C $\alpha$  RMSD b). PB substitution score for interacting residues vs. rest of surface residues for each of the 77 protein-protein complex pairs. The line indicating the trend of the scores is shown in brown. The line depicting an exact 1:1 correspondence in scores is shown as an yellow dotted line.
